# Supplementary material for: Association between masticatory function and Parkinson’s disease: A population-based study
Source: Research Square preprint supplement (doi:10.21203/rs.3.rs-7634776/v1), 2025-10-30
Supplement: Supplementary file 1 [file d4162fddc6c8fe3ad2c95dbd.docx]

Tabel S1: Baseline character of final analysis according to FTU subgroups in the primary analyses.

| Variable | 0-3 | 4-6 | 7-9 | 10-12 | *P* value |
| --- | --- | --- | --- | --- | --- |
| Age (year) | 61.51(0.22) | 53.45(0.35) | 50.59(0.33) | 40.76(0.24) | <.001 |
| Tooth number | 9.91(0.14) | 22.54(0.04) | 24.94(0.03) | 27.36(0.01) | <.001 |
| FTU | 0.74(0.02) | 5.10(0.01) | 7.98(0.01) | 11.47(0.01) | <.001 |
| Gender |  |  |  |  | <.001 |
| Female | 5313(53.36) | 2073(50.51) | 2418(51.57) | 8755(49.27) |  |
| Male | 5254(46.64) | 2139(49.49) | 2363(48.43) | 9353(50.73) |  |
| Race |  |  |  |  | <.001 |
| Mexican American | 1298(4.38) | 731(7.79) | 919(8.70) | 3280(8.24) |  |
| Non-Hispanic Black | 2838(15.05) | 1067(14.88) | 987(11.53) | 2846(7.73) |  |
| Non-Hispanic White | 4989(69.77) | 1670(63.27) | 2072(67.62) | 8874(73.17) |  |
| Other Hispanic | 873(5.40) | 442(7.16) | 412(6.20) | 1166(4.46) |  |
| Other Race | 569(5.40) | 302(6.90) | 391(5.96) | 1942(6.40) |  |
| Education level |  |  |  |  | <.001 |
| Below high school | 4231(31.68) | 1254(22.27) | 1179(16.25) | 2809(9.30) |  |
| High school | 2911(32.32) | 1103(30.14) | 1224(28.53) | 3495(19.05) |  |
| Above high school | 3425(36.00) | 1855(47.58) | 2378(55.22) | 11804(71.66) |  |
| Poverty |  |  |  |  | <.001 |
| Low income | 4191(31.96) | 1354(24.60) | 1343(19.42) | 4174(15.45) |  |
| Moderate income | 4490(44.16) | 1708(40.67) | 1884(37.63) | 6340(31.60) |  |
| High income | 1886(23.87) | 1150(34.73) | 1554(42.95) | 7594(52.96) |  |
| Marital status |  |  |  |  | <.001 |
| Married/Living with Partner | 5711(57.72) | 2582(64.19) | 3110(68.09) | 11470(66.20) |  |
| Widowed/Divorced/Separated | 4022(34.84) | 1135(24.89) | 1060(20.00) | 2285(11.73) |  |
| Never married | 834(7.44) | 495(10.92) | 611(11.90) | 4353(22.08) |  |
| Body mass index |  |  |  |  | <.001 |
| Normal | 2750(25.71) | 973(24.67) | 1295(27.34) | 6035(34.37) |  |
| Overweight | 3630(33.39) | 1516(34.07) | 1619(33.88) | 6030(33.14) |  |
| Obese | 4187(40.91) | 1723(41.26) | 1867(38.78) | 6043(32.49) |  |
| Smoke |  |  |  |  | <.001 |
| Never | 4000(34.25) | 2027(43.97) | 2618(51.43) | 11391(61.83) |  |
| Former | 3695(34.46) | 1243(31.14) | 1174(26.22) | 3533(21.08) |  |
| Now | 2872(31.29) | 942(24.88) | 989(22.35) | 3184(17.08) |  |
| Alcohol consumption |  |  |  |  | <.001 |
| Never | 1746(14.34) | 627(11.92) | 663(10.98) | 2176(9.59) |  |
| Former | 3238(29.08) | 813(17.74) | 758(13.92) | 1830(8.85) |  |
| Mild | 3092(30.34) | 1386(34.53) | 1725(38.46) | 6592(38.57) |  |
| Moderate | 1075(11.25) | 604(16.01) | 716(17.19) | 3245(19.48) |  |
| Heavy | 1416(14.99) | 782(19.79) | 919(19.46) | 4265(23.50) |  |
| Diabetes |  |  |  |  | <.001 |
| No | 7635(76.37) | 3393(83.93) | 4058(87.49) | 16755(94.13) |  |
| Yes | 2932(23.63) | 819(16.07) | 723(12.51) | 1353(5.87) |  |
| Hypertension |  |  |  |  | <.001 |
| No | 3686(39.51) | 2047(51.32) | 2646(56.24) | 13053(73.49) |  |
| Yes | 6881(60.49) | 2165(48.68) | 2135(43.76) | 5055(26.51) |  |
| CVD |  |  |  |  | <.001 |
| No | 8046(77.12) | 3707(89.65) | 4329(90.94) | 17393(96.70) |  |
| Yes | 2521(22.88) | 505(10.35) | 452(9.06) | 715(3.30) |  |
| Functional dentition |  |  |  |  | <.001 |
| No | 9008(83.74) | 411(8.24) | 30(0.64) | 6(0.02) |  |
| Yes | 1559(16.26) | 3801(91.76) | 4751(99.36) | 18102(99.98) |  |
| Masticatory dysfunction |  |  |  |  | <.001 |
| No | 0(0.00) | 2766(66.71) | 4781(100.00) | 18108(100.00) |  |
| Yes | 10567(100.00) | 1446(33.29) | 0(0.00) | 00.00) |  |
| Complete dentition |  |  |  |  | <.001 |
| No | 10567(100.00) | 4212(100.00) | 4781(100.00) | 6223(32.49) |  |
| Yes | 0(0.00) | 0(0.00) | 0(0.00) | 11885(67.51) |  |
| Parkinson |  |  |  |  | <.001 |
| No | 10416(98.39) | 4152(98.77) | 4745(99.29) | 18021(99.53) |  |
| Yes | 151(1.61) | 60(1.23) | 36(0.71) | 87(0.47) |  |

Abbreviations: CVD: cardiovascular diseases; FTU: functional teeth unit; PD: Parkinson’s disease.

Table S2: Baseline characteristics according to the presence of PD in the secondary analyses.

| Variable | Total | Non-PD | PD | *P*-value |
| --- | --- | --- | --- | --- |
| Age (year) | 47.36(0.22) | 47.29(0.22) | 55.87(1.24) | <.001 |
| HEI-score | 50.73(0.20) | 50.74(0.20) | 49.67(1.03) | 0.3 |
| SII | 556.70(3.35) | 556.00(3.33) | 641.03(33.00) | 0.01 |
| Tooth number | 23.15(0.11) | 23.18(0.11) | 19.29(0.85) | <.001 |
| FTU | 8.32(0.06) | 8.34(0.06) | 5.86(0.41) | <.001 |
| Gender |  |  |  | 0.08 |
| Female | 17170(50.47) | 17011(50.42) | 159(57.28) |  |
| Male | 17771(49.53) | 17618(49.58) | 153(42.72) |  |
| Race |  |  |  | 0.12 |
| Mexican American | 5892(7.58) | 5854(7.61) | 38(4.33) |  |
| Non-Hispanic Black | 6885(9.95) | 6842(9.97) | 43(7.86) |  |
| Non-Hispanic White | 16644(71.27) | 16446(71.21) | 198(79.18) |  |
| Other Hispanic | 2693(4.95) | 2672(4.96) | 21(3.48) |  |
| Other Race | 2827(6.24) | 2815(6.25) | 12(5.15) |  |
| Education level |  |  |  | 0.07 |
| Below high school | 8649(15.39) | 8554(15.34) | 95(21.58) |  |
| High school | 8120(23.98) | 8056(23.95) | 64(26.82) |  |
| Above high school | 18172(60.64) | 18019(60.71) | 153(51.60) |  |
| Poverty |  |  |  | 0.002 |
| Low income | 10104(20.43) | 9991(20.35) | 113(29.95) |  |
| Moderate income | 13348(34.96) | 13226(34.93) | 122(37.95) |  |
| High income | 11489(44.62) | 11412(44.72) | 77(32.10) |  |
| Marital status |  |  |  | 0.07 |
| Married/Living with Partner | 21419(63.90) | 21243(63.94) | 176(59.07) |  |
| Widowed/Divorced/Separated | 7788(18.80) | 7698(18.74) | 90(25.90) |  |
| Never married | 5734(17.31) | 5688(17.32) | 46(15.03) |  |
| Body mass index |  |  |  | 0.47 |
| Normal | 10118(30.75) | 10037(30.78) | 81(27.28) |  |
| Overweight | 11922(33.48) | 11833(33.49) | 89(32.10) |  |
| Obese | 12901(35.77) | 12759(35.73) | 142(40.62) |  |
| Smoke |  |  |  | 0.12 |
| Never | 18590(53.27) | 18440(53.27) | 150(53.25) |  |
| Former | 9022(25.39) | 8934(25.43) | 88(20.26) |  |
| Now | 7329(21.34) | 7255(21.30) | 74(26.48) |  |
| Alcohol consumption |  |  |  | <.001 |
| Never | 4726(10.87) | 4683(10.86) | 43(12.46) |  |
| Former | 6137(14.16) | 6042(14.08) | 95(24.16) |  |
| Mild | 11927(36.31) | 11819(36.31) | 108(37.13) |  |
| Moderate | 5296(17.38) | 5272(17.45) | 24(9.08) |  |
| Heavy | 6855(21.27) | 6813(21.31) | 42(17.16) |  |
| Diabetes |  |  |  | .001 |
| No | 29571(88.75) | 29339(88.81) | 232(81.79) |  |
| Yes | 5370(11.25) | 5290(11.19) | 80(18.21) |  |
| Hypertension |  |  |  | <.001 |
| No | 19950(62.26) | 19818(62.39) | 132(46.62) |  |
| Yes | 14991(37.74) | 14811(37.61) | 180(53.38) |  |
| CVD |  |  |  | <.001 |
| No | 31070(91.27) | 30842(91.38) | 228(78.15) |  |
| Yes | 3871(8.73) | 3787(8.62) | 84(21.85) |  |
| CKD |  |  |  | <.001 |
| No | 28536(85.90) | 28323(86.01) | 213(73.03) |  |
| Yes | 6405(14.10) | 6306(13.99) | 99(26.97) |  |
| Hyperlipidemia |  |  |  | 0.03 |
| No | 9581(28.25) | 9512(28.31) | 69(20.84) |  |
| Yes | 25360(71.75) | 25117(71.69) | 243(79.16) |  |
| Functional dentition |  |  |  | <.001 |
| No | 8627(17.52) | 8502(17.37) | 125(34.45) |  |
| Yes | 26314(82.48) | 26127(82.63) | 187(65.55) |  |
| Masticatory dysfunction |  |  |  | <.001 |
| No | 23948(76.95) | 23798(77.13) | 150(55.07) |  |
| Yes | 10993(23.05) | 10831(22.87) | 162(44.93) |  |
| Complete dentition |  |  |  | <.001 |
| No | 23813(60.25) | 23544(60.07) | 269(81.79) |  |
| Yes | 11128(39.75) | 11085(39.93) | 43(18.21) |  |

Abbreviations: CKD: chronic kidney disease; CRP: C-reactive protein; CVD: cardiovascular diseases; FTU: functional teeth unit; HEI: healthy eating index; PD: Parkinson’s disease; SII: systemic immune-inflammation index.
